# Supplementary material
Source: PubMed Central journal article supplement (PMC5070265)
Supplement: cpr-7-3-301-supp01.pdf [file cpr-7-3-301-supp01.pdf]

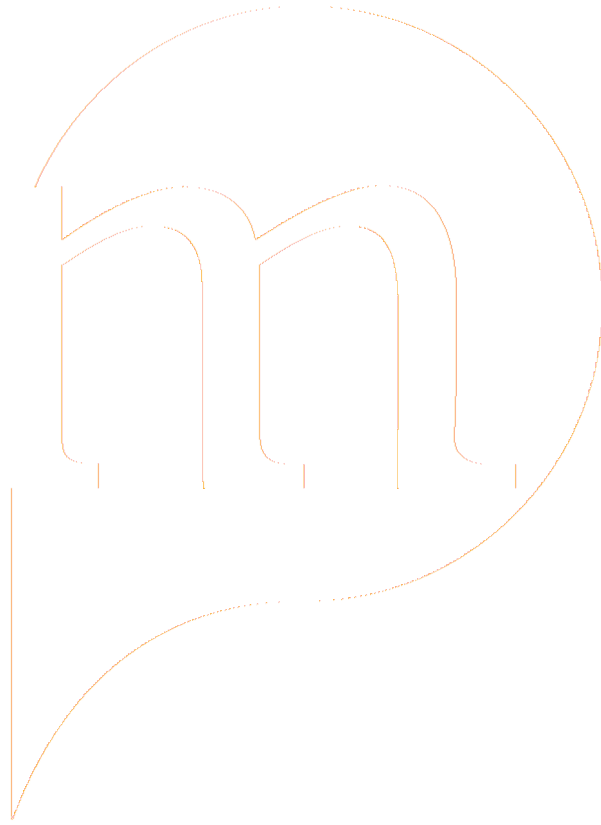

PROJECT MUSE®

Organizational CBPR Capacity Self Assessment

|                                                                                                                                                                                                                                                                                                                                                                                                                                     | Stage 1                                                                                                                            | Stage 2                                                                                                                                                                                                                                                          | Stage 3                                                                                                                                         | Stage 4                                                                                                                                                                                                                     | Comments |
|-------------------------------------------------------------------------------------------------------------------------------------------------------------------------------------------------------------------------------------------------------------------------------------------------------------------------------------------------------------------------------------------------------------------------------------|------------------------------------------------------------------------------------------------------------------------------------|------------------------------------------------------------------------------------------------------------------------------------------------------------------------------------------------------------------------------------------------------------------|-------------------------------------------------------------------------------------------------------------------------------------------------|-----------------------------------------------------------------------------------------------------------------------------------------------------------------------------------------------------------------------------|----------|
| 1.<br>CBPR training<br>Capacity                                                                                                                                                                                                                                                                                                                                                                                                     | No staff have participated in CBPR training & no mechanisms have been developed to train staff or partners about research/CBPR.    | Some staff have participated in CBPR training and informally share some information with other staff or partners.                                                                                                                                                | A substantial number of staff have participated in training. Information is formally shared through staff or other meetings.                    | Most staff have basic understanding of CBPR/research. Some staff have in-depth understanding & training. There are periodic CBPR trainings for staff.                                                                       |          |
| Choose the stage that characterizes your CBO before PERCH: 1 <input type="checkbox"/> 2 <input type="checkbox"/> 3 <input type="checkbox"/> 4 <input type="checkbox"/> Unable to assess <input type="checkbox"/><br>Choose the stage that characterizes your CBO after PERCH: 1 <input type="checkbox"/> 2 <input type="checkbox"/> 3 <input type="checkbox"/> 4 <input type="checkbox"/> Unable to assess <input type="checkbox"/> |                                                                                                                                    |                                                                                                                                                                                                                                                                  |                                                                                                                                                 |                                                                                                                                                                                                                             |          |
| 2.<br>Depth                                                                                                                                                                                                                                                                                                                                                                                                                         | No staff have dedicated duties or responsibilities regarding research. There is no administrative support for research activities. | One staff person is identified as the organizational point person for research. There is limited administrative support for research activities.                                                                                                                 | One staff person has dedicated responsibilities in their job description. There is administrative support.                                      | Several staff have dedicated responsibilities in their job description. There is extensive administrative support.                                                                                                          |          |
| Choose the stage that characterizes your CBO before PERCH: 1 <input type="checkbox"/> 2 <input type="checkbox"/> 3 <input type="checkbox"/> 4 <input type="checkbox"/> Unable to assess <input type="checkbox"/><br>Choose the stage that characterizes your CBO after PERCH: 1 <input type="checkbox"/> 2 <input type="checkbox"/> 3 <input type="checkbox"/> 4 <input type="checkbox"/> Unable to assess <input type="checkbox"/> |                                                                                                                                    |                                                                                                                                                                                                                                                                  |                                                                                                                                                 |                                                                                                                                                                                                                             |          |
| 3.<br>Value on<br>research<br>participation/<br>use                                                                                                                                                                                                                                                                                                                                                                                 | Research is not valued or promoted by leaders (ED, program directors, board members) & not included in mission/strategic plan.     | Research is referred to in the mission/strategic plan but is not openly valued or explicitly promoted by leaders.                                                                                                                                                | Research is openly valued but is not explicitly used or promoted by leaders. Staff are encouraged to participate in research projects/training. | Research is openly valued & is explicitly used or promoted by leaders.                                                                                                                                                      |          |
| Choose the stage that characterizes your CBO before PERCH: 1 <input type="checkbox"/> 2 <input type="checkbox"/> 3 <input type="checkbox"/> 4 <input type="checkbox"/> Unable to assess <input type="checkbox"/><br>Choose the stage that characterizes your CBO after PERCH: 1 <input type="checkbox"/> 2 <input type="checkbox"/> 3 <input type="checkbox"/> 4 <input type="checkbox"/> Unable to assess <input type="checkbox"/> |                                                                                                                                    |                                                                                                                                                                                                                                                                  |                                                                                                                                                 |                                                                                                                                                                                                                             |          |
| 4.<br>Identified<br>research<br>priorities/<br>agenda                                                                                                                                                                                                                                                                                                                                                                               | There are no identified research priorities or research agenda. There is no way of tracking research involvement for the CBO.      | Planning efforts have begun to develop research questions/agenda (meetings with stakeholders and/or staff, gathered models from other CBOs). There is some understanding of the CBO's research involvement but these are not ongoing, systematic or coordinated. | There is an identified set of research priorities. There are some mechanisms for tracking research involvement by the CBO.                      | The CBO has developed a research agenda/priorities with stakeholder input. This is updated periodically. CBO proactively seeks opportunities to address the agenda. The CBO tracks & coordinates their research activities. |          |
| Choose the stage that characterizes your CBO before PERCH: 1 <input type="checkbox"/> 2 <input type="checkbox"/> 3 <input type="checkbox"/> 4 <input type="checkbox"/> Unable to assess <input type="checkbox"/><br>Choose the stage that characterizes your CBO after PERCH: 1 <input type="checkbox"/> 2 <input type="checkbox"/> 3 <input type="checkbox"/> 4 <input type="checkbox"/> Unable to assess <input type="checkbox"/> |                                                                                                                                    |                                                                                                                                                                                                                                                                  |                                                                                                                                                 |                                                                                                                                                                                                                             |          |

|                                                               |                                                                                                                                                                                                                  |                                                                                                                                                              |                                                                                                                                                           |                                                                                                                                          |  |
|---------------------------------------------------------------|------------------------------------------------------------------------------------------------------------------------------------------------------------------------------------------------------------------|--------------------------------------------------------------------------------------------------------------------------------------------------------------|-----------------------------------------------------------------------------------------------------------------------------------------------------------|------------------------------------------------------------------------------------------------------------------------------------------|--|
| 5.<br>Mechanisms<br>for<br>dissemination                      | There are no mechanisms or existing mechanisms (newsletter, listserv, website, community events, journal articles) are not used for disseminating research results or projects.                                  | There is little effort or mechanisms to disseminate.                                                                                                         | There are some efforts to disseminate.                                                                                                                    | There are extensive efforts to disseminate through a variety of mechanisms.                                                              |  |
|                                                               | Choose the stage that characterizes your CBO before PERCH: 1 <input type="checkbox"/> 2 <input type="checkbox"/> 3 <input type="checkbox"/> 4 <input type="checkbox"/> Unable to assess <input type="checkbox"/> |                                                                                                                                                              |                                                                                                                                                           |                                                                                                                                          |  |
|                                                               | Choose the stage that characterizes your CBO after PERCH: 1 <input type="checkbox"/> 2 <input type="checkbox"/> 3 <input type="checkbox"/> 4 <input type="checkbox"/> Unable to assess <input type="checkbox"/>  |                                                                                                                                                              |                                                                                                                                                           |                                                                                                                                          |  |
| 6.<br>Navigation                                              | There is no capacity to navigate university or funder systems. There is little or no understanding of these systems (e.g. timelines, requirements).                                                              | There is some experience navigating these systems (experience applying for a grant) & some understanding.                                                    | There is substantial experience & understanding (e.g. received & administered university or other funds). Attended workshop on university/funder systems. | There is extensive understanding. Successfully managed several research grants from local/national & private/govt. funders               |  |
|                                                               | Choose the stage that characterizes your CBO before PERCH: 1 <input type="checkbox"/> 2 <input type="checkbox"/> 3 <input type="checkbox"/> 4 <input type="checkbox"/> Unable to assess <input type="checkbox"/> |                                                                                                                                                              |                                                                                                                                                           |                                                                                                                                          |  |
|                                                               | Choose the stage that characterizes your CBO after PERCH: 1 <input type="checkbox"/> 2 <input type="checkbox"/> 3 <input type="checkbox"/> 4 <input type="checkbox"/> Unable to assess <input type="checkbox"/>  |                                                                                                                                                              |                                                                                                                                                           |                                                                                                                                          |  |
| 7.<br>Research<br>policies/<br>procedures                     | There are no research policies or procedures (e.g. MOU, rules or engagement) for the CBO.                                                                                                                        | Planning efforts have begun to develop research policies or procedures (meetings with stakeholders &/or staff, gathered models from other CBOs).             | There are some research policies or procedures but they are used inconsistently.                                                                          | There are formal research policies & procedures & they are consistently understood & used throughout the CBO.                            |  |
|                                                               | Choose the stage that characterizes your CBO before PERCH: 1 <input type="checkbox"/> 2 <input type="checkbox"/> 3 <input type="checkbox"/> 4 <input type="checkbox"/> Unable to assess <input type="checkbox"/> |                                                                                                                                                              |                                                                                                                                                           |                                                                                                                                          |  |
|                                                               | Choose the stage that characterizes your CBO after PERCH: 1 <input type="checkbox"/> 2 <input type="checkbox"/> 3 <input type="checkbox"/> 4 <input type="checkbox"/> Unable to assess <input type="checkbox"/>  |                                                                                                                                                              |                                                                                                                                                           |                                                                                                                                          |  |
| 8.<br>Access to<br>funding &<br>resources/<br>fiscal capacity | There is no access to research funding and resources. There is no capacity to administer a research grant.                                                                                                       | There is limited understanding of where and how to access research funding. Limited capacity to administer a research grant                                  | There is some understanding of where & how to access research funding. CBO has experience managing small research grant.                                  | There is extensive understanding of where & how to access research funding. CBO has managed several research grants.                     |  |
|                                                               | Choose the stage that characterizes your CBO before PERCH: 1 <input type="checkbox"/> 2 <input type="checkbox"/> 3 <input type="checkbox"/> 4 <input type="checkbox"/> Unable to assess <input type="checkbox"/> |                                                                                                                                                              |                                                                                                                                                           |                                                                                                                                          |  |
|                                                               | Choose the stage that characterizes your CBO after PERCH: 1 <input type="checkbox"/> 2 <input type="checkbox"/> 3 <input type="checkbox"/> 4 <input type="checkbox"/> Unable to assess <input type="checkbox"/>  |                                                                                                                                                              |                                                                                                                                                           |                                                                                                                                          |  |
| 9.<br>Partnership<br>skills                                   | There are no connections or relationships with university partners. The CBO does not have a strong history of collaboration.                                                                                     | There are some informal relationships with university partners but no collaborative projects have been negotiated or implemented. Attended networking event. | Formal relationships have been negotiated with university partners & collaborative projects have been developed & implemented.                            | There are well-established & sustained relationships with university partners & collaborative projects have been successfully completed. |  |
|                                                               | Choose the stage that characterizes your CBO before PERCH: 1 <input type="checkbox"/> 2 <input type="checkbox"/> 3 <input type="checkbox"/> 4 <input type="checkbox"/> Unable to assess <input type="checkbox"/> |                                                                                                                                                              |                                                                                                                                                           |                                                                                                                                          |  |

|                                    |                                                                                                                                                                                                                                                                                                                                                                                                                                     |                                                                                       |                                                                                                                  |                                                                                                                            |  |
|------------------------------------|-------------------------------------------------------------------------------------------------------------------------------------------------------------------------------------------------------------------------------------------------------------------------------------------------------------------------------------------------------------------------------------------------------------------------------------|---------------------------------------------------------------------------------------|------------------------------------------------------------------------------------------------------------------|----------------------------------------------------------------------------------------------------------------------------|--|
|                                    | Choose the stage that characterizes your CBO after PERCH: 1 <input type="checkbox"/> 2 <input type="checkbox"/> 3 <input type="checkbox"/> 4 <input type="checkbox"/> Unable to assess <input type="checkbox"/>                                                                                                                                                                                                                     |                                                                                       |                                                                                                                  |                                                                                                                            |  |
| 10.<br>Community<br>Leadership     | CBO does not undertake any activity to serve as a leader for advancing CBPR with other CBOs.                                                                                                                                                                                                                                                                                                                                        | CBO has informally provided assistance or passed on information to 1 or 2 other CBOs. | CBO has made efforts to pass on info to other CBOs. CBO has spoken about their experiences at relevant events.   | CBO has held formal events to provide CBPR information or training to other CBOs. Presented at local/national conferences. |  |
|                                    | Choose the stage that characterizes your CBO before PERCH: 1 <input type="checkbox"/> 2 <input type="checkbox"/> 3 <input type="checkbox"/> 4 <input type="checkbox"/> Unable to assess <input type="checkbox"/><br>Choose the stage that characterizes your CBO after PERCH: 1 <input type="checkbox"/> 2 <input type="checkbox"/> 3 <input type="checkbox"/> 4 <input type="checkbox"/> Unable to assess <input type="checkbox"/> |                                                                                       |                                                                                                                  |                                                                                                                            |  |
| 11.<br>Institutional<br>Leadership | CBO does not undertake any activity to serve as a leader for advancing CBPR with universities.                                                                                                                                                                                                                                                                                                                                      | CBO has informally provided assistance consultation to universities.                  | CBO has made efforts to pass on info to universities. CBO has spoken about their experiences at relevant events. | CBO has formally served in influential leadership roles to universities. Presented at sessions for university partners.    |  |
|                                    | Choose the stage that characterizes your CBO before PERCH: 1 <input type="checkbox"/> 2 <input type="checkbox"/> 3 <input type="checkbox"/> 4 <input type="checkbox"/> Unable to assess <input type="checkbox"/><br>Choose the stage that characterizes your CBO after PERCH: 1 <input type="checkbox"/> 2 <input type="checkbox"/> 3 <input type="checkbox"/> 4 <input type="checkbox"/> Unable to assess <input type="checkbox"/> |                                                                                       |                                                                                                                  |                                                                                                                            |  |
